# Supplementary material for: HOXC9 directly regulates distinct sets of genes to coordinate diverse cellular processes during neuronal differentiation
Source: PubMed Central journal article supplement (PMC3906982; doi:10.1186/1471-2164-14-830), 2013-11-25
Supplement: 1471-2164-14-830-S3.pdf [file 1471-2164-14-830-S3.pdf]

Neurological process of neurons

Sympathetic nervous system development

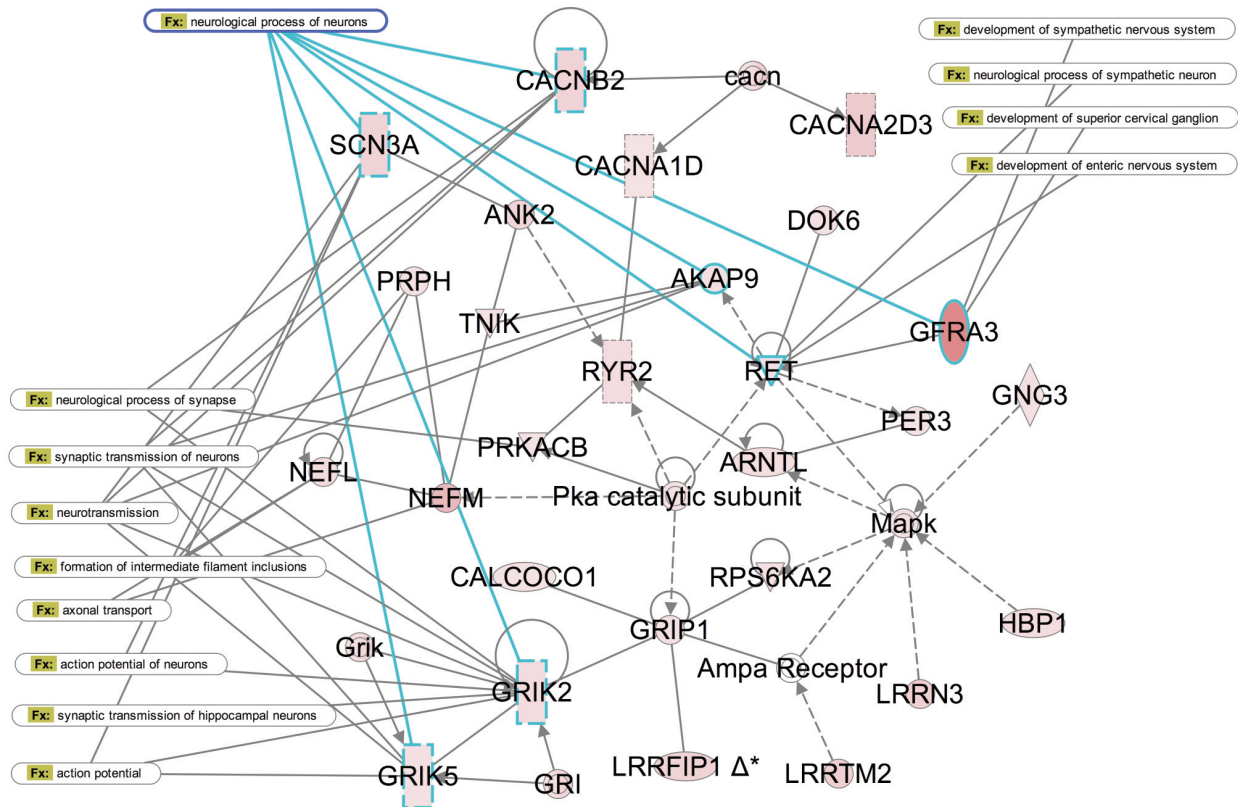

**Figure S1 Global upregulation of neuronal genes by HOXC9.** IPA of HOXC9-responsive neuronal genes, showing marked upregulation of genes important for the neurological process of neurons and the development of the sympathetic nervous system. Red color indicates a significant increase in expression with the color intensity being proportional to fold change. Solid lines indicate a direct relationship and dashed lines indicate an indirect interaction.

**A** Cyclins\_CDKs

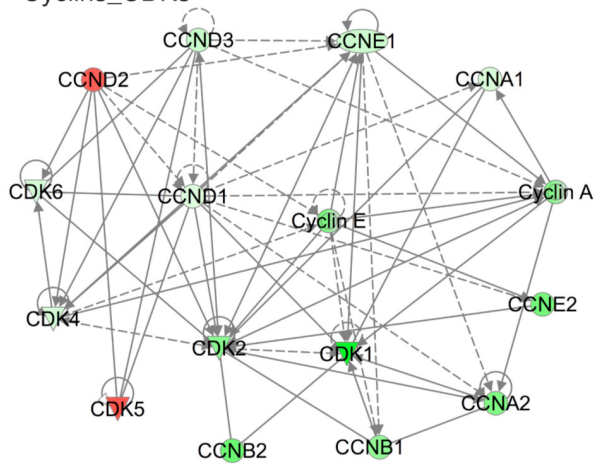

**D** DSB repair\_FA-mediated repair

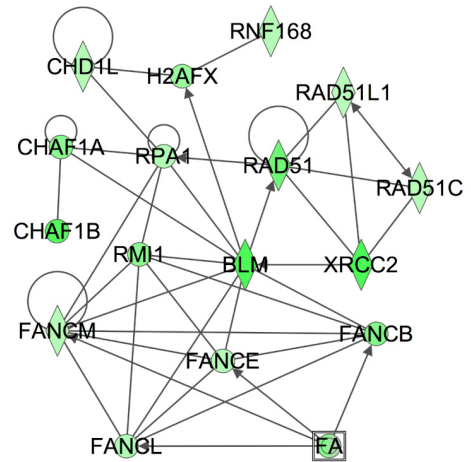

**B** DNA replication

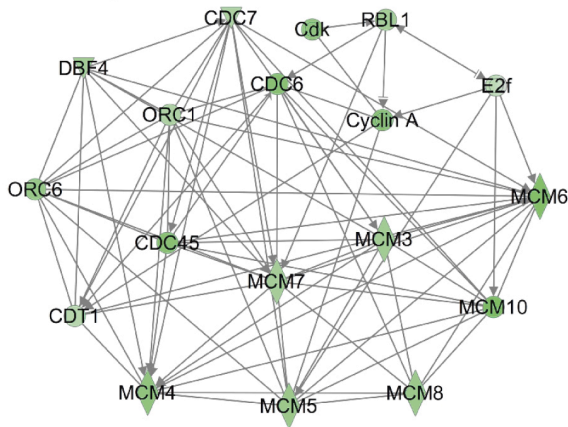

**E** Mismatch repair

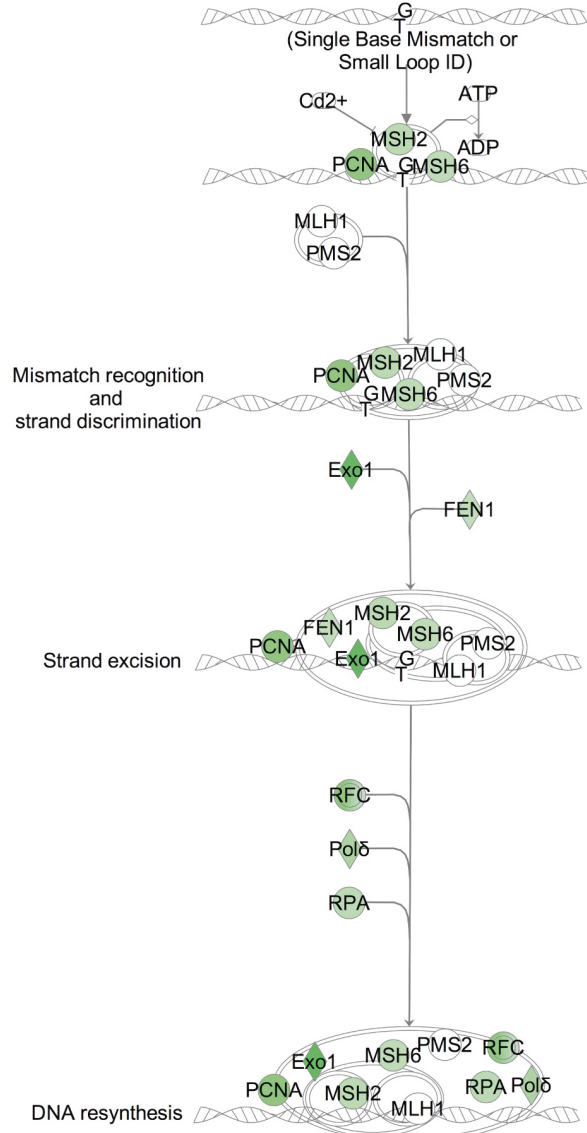

**C** Mitosis

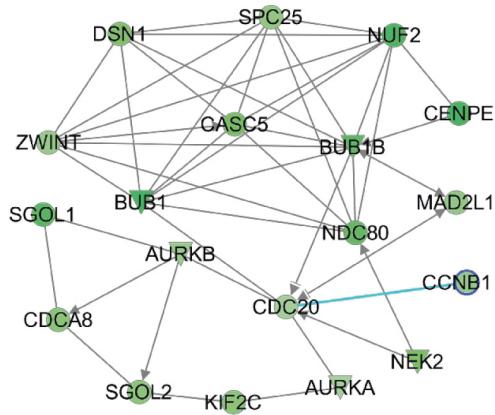

**Figure S2 Global downregulation of cell cycle and DNA damage response genes by HOXC9.** IPA of HOXC9-responsive genes, showing downregulation of cyclins and CDKs (**A**), and genes essential for DNA replication (**B**), mitosis (**C**), double-strand break (DSB) repair and Fanconi anemia (FA)-mediated repair (**D**), and mismatch repair (**E**). Red and green colors indicate a significant increase and decrease in expression, respectively, with the color intensity being proportional to fold change. Solid and dashed lines indicate direct and indirect interactions, respectively.

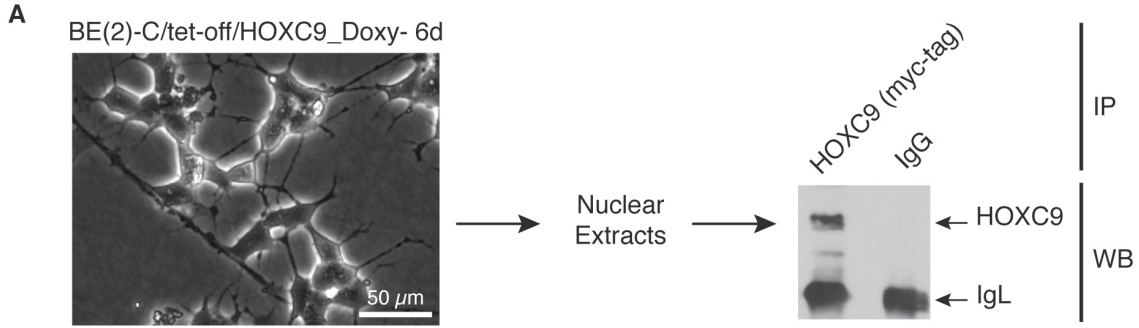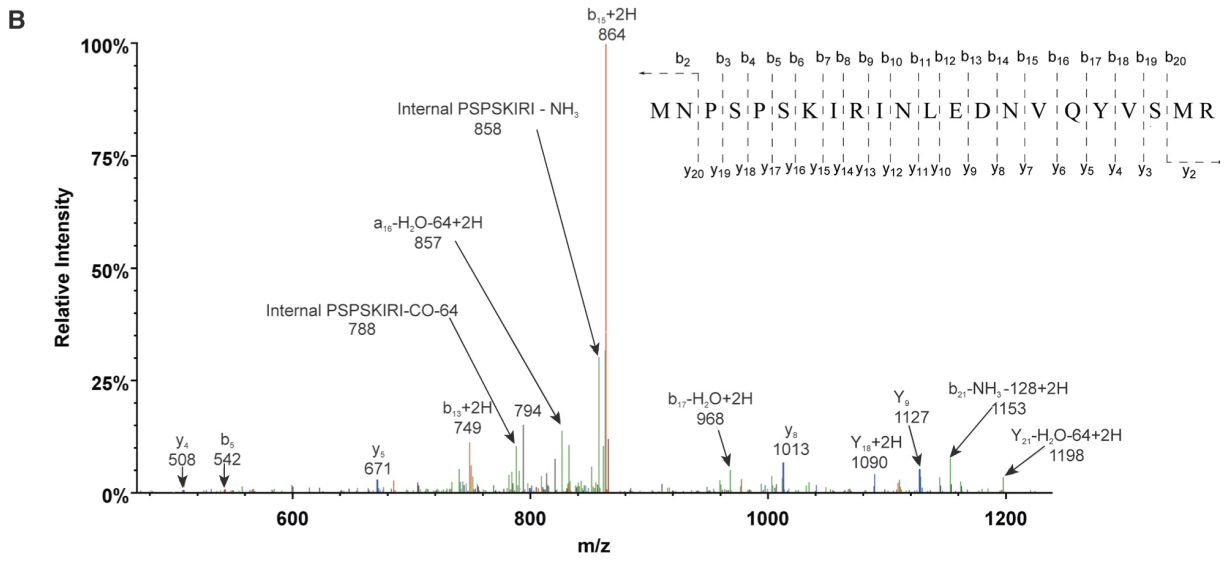

gjl119621336 (94%), 28,102.9 Da  
 E2F transcription factor 6, isoform CRA\_a [Homo sapiens] [MASS=28102]  
 1 unique peptides, 1 unique spectra, 1 total spectra, 22/249 amino acids (9% coverage)

**MNPSPSKIRI** **NLEDNVQYVS** **MR**KALKVKRP RFDVSLVYLT RKFM DLVRS A PGG I LD LNK V  
 ATKLGVRKRR VYDITNVLDG IDLVEKKS KN HIRWIGSDLS NFGAVPQQKK LOEELSDL S A  
 MEDALDEL I K DCAOQLFELT DDKENERLAY VTYQDIHSIQ AFHEQIVIAV KAPAETRLDV  
 PAPREDSITV HIRSTNGPID VYLCEVEEQGQ TSNKRSEGVG TSSSESTHPE GP EEEENPQQ  
 SEELLEVS N

**C** HOXC9-responsive genes\_down  
 Motif\_E2F (n=155)

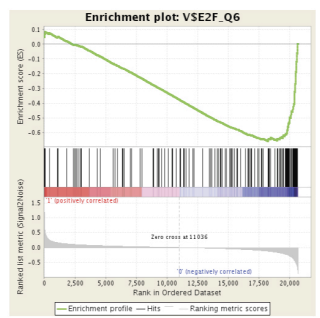

**Figure S3 Identification of E2F6 as a HOXC9-interacting protein.** (A) Schematic of experiment. Anti-myc-tag immunoprecipitation with nuclear extracts from BE(2)-C/Tet-Off/myc-HOXC9 cells cultured in the absence of doxycycline (Doxy) for 6 days. IP, immunoprecipitation; IB, immunoblotting. (B) Collision-induced fragmentation spectra of the E2F6 unique peptide MNPSPSKIRINLEDNVQYVSMR (+3 charge state). Insert shows all possible b and y peptide ions arising from the scission of all available peptide bonds of the E2F6 peptide. m/z, mass-to-charge ratio. (C) GSEA showing significant enrichment of E2F-binding motif among the genes downregulated by HOXC9.

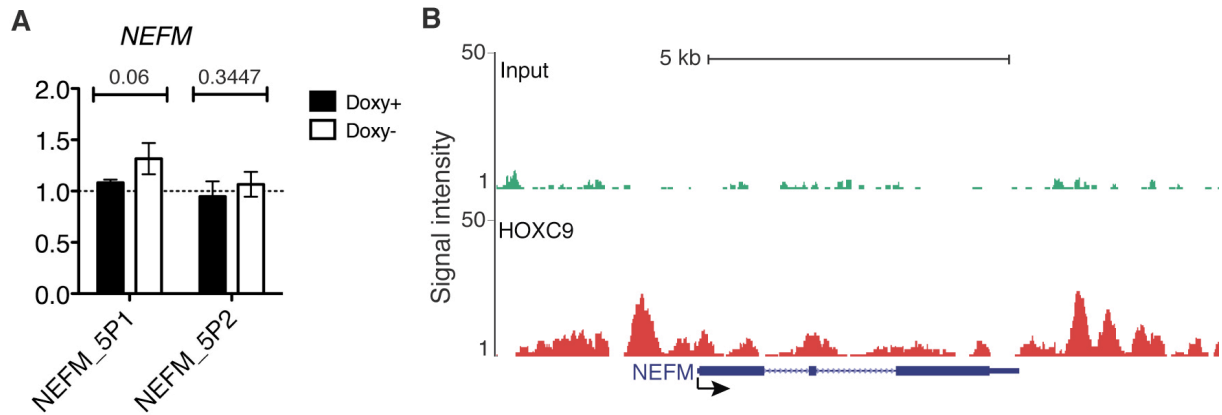

**Figure S4 E2F6 does not bind to the neuronal HOXC9 target gene NEFM in vivo.** (A) ChIP-qPCR analysis showing no E2F6 binding to the promoter of the neuronal gene *NEFM* in BE(2)-C/Tet-Off/myc-HOXC9 cells before (Doxy+) and after (Doxy-) HOXC9 induction. Dashed line indicates IgG control. Error bars represent SD (n = 3). Data were analyzed with unpaired, two-tailed Student's *t*-test and *p* values are indicated. (B) ChIP-seq tag profile showing HOXC9 binding to the *NEFM* locus.
